# Supplementary material for: Structure‐function analysis for the development of peptide inhibitors for a Gram‐positive quorum sensing system
Source: PubMed Central journal article supplement — Mol Microbiol. 2022 May 28;117(6):1464–78. doi: 10.1111/mmi.14921 (PMC9233744; doi:10.1111/mmi.14921), 2022-05-28
Supplement: NIHMS1815076-supplement-Supplementary_file.pdf [file NIHMS1815076-supplement-Supplementary_file.pdf]

1 **Supplementary Information**

2

3 **Structure-function analysis for development of peptide inhibitors for a Gram positive**  
4 **quorum sensing system**

5 **Iman Tajer Abdullah<sup>1,2</sup>, Andrew T. Ulijasz<sup>3</sup>, Umakhanth Venkatraman Girija<sup>1</sup>, Sien**  
6 **Tam<sup>4</sup>, Peter Andrew<sup>1</sup>, N. Luisa Hiller<sup>4</sup>, Russell Wallis<sup>1</sup> and Hasan Yesilkaya<sup>1\*</sup>**

7 <sup>1</sup>Department of Respiratory Sciences, University of Leicester, Leicester, United Kingdom

8 <sup>2</sup>Department of Biology, College of Science, University of Kirkuk, Iraq

9 <sup>3</sup>Department of Microbiology and Immunology, Loyola University Chicago, Maywood, IL, USA

10 <sup>4</sup>Department of Biological Sciences, Carnegie Mellon University, Pittsburgh, PA 15213

11

12

13 **\*Corresponding author:** [hy3@le.ac.uk](mailto:hy3@le.ac.uk), +441162231401

14

15 **Key words:** Rgg transcriptional regulators, *Streptococcus pneumoniae*, quorum sensing,  
16 structure-function, inhibitor design

17

18 **Running title:** Inhibition of a Gram positive quorum sensing system

19

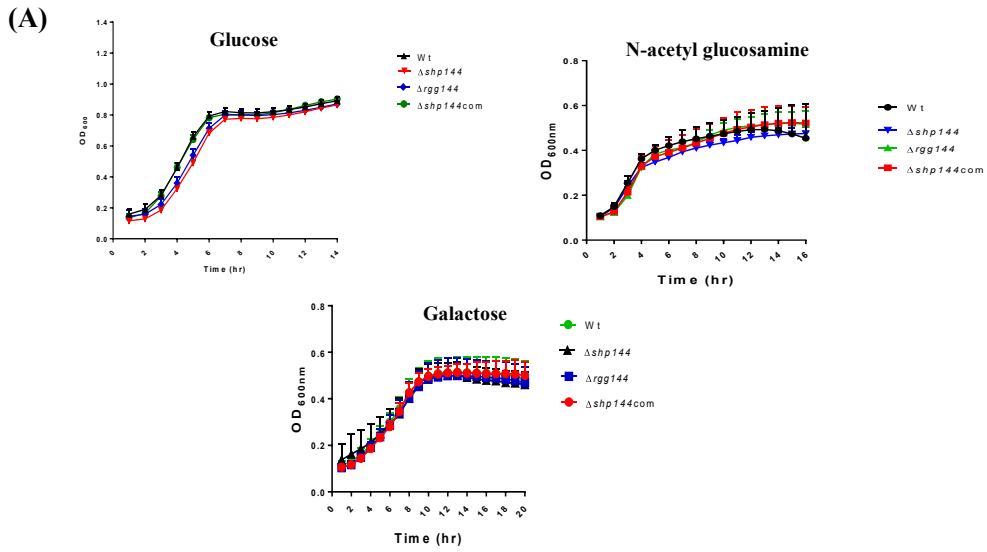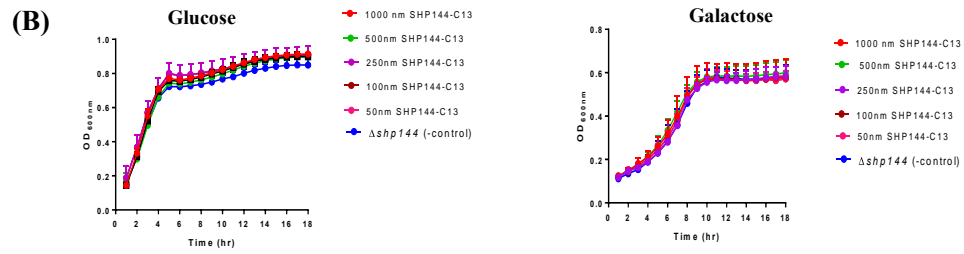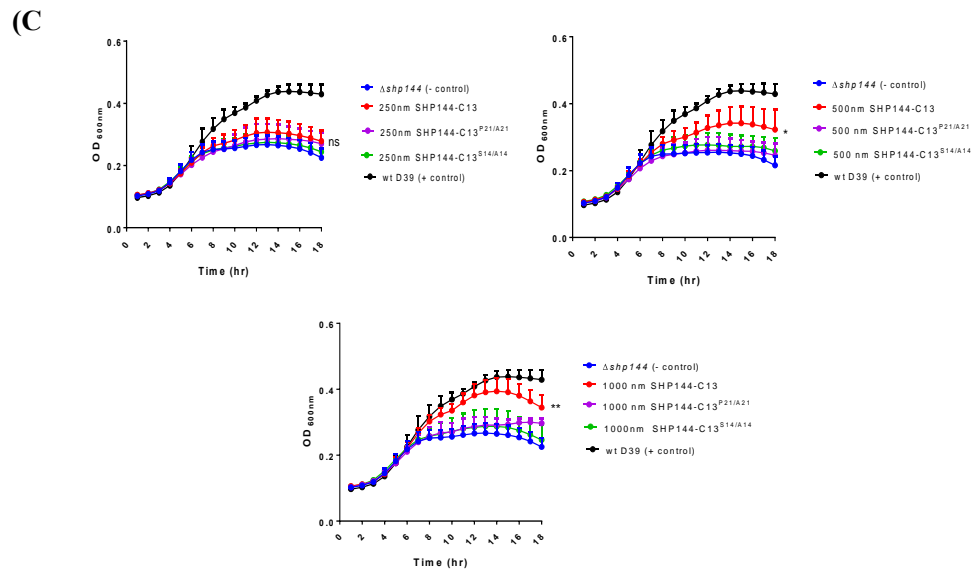

21 **Figure S1: (A)** Pneumococcal growth curves in CDM supplemented with 55nM of desired sugar  
22 (glucose, N-acetylglucosamine and galactose). Error bars indicate standard error of the mean of at  
23 least three independent experiments each with three replicates. No significant difference has been  
24 seen by using those selected sugars. **(B)** Growth curve of  $\Delta shp144$  showing inability of unmodified  
25 SHP144-C13 to restore mutant growth properties in media containing either glucose or galactose.  
26 Comparisons are made relative to  $\Delta shp144$  culture without peptide. **(C)** Investigation the specificity of  
27 functional complementation of  $\Delta shp144$  growth by using modified SHP144. Various concentrations  
28 of native and modified SHP144-C13 (P 21A and S14A) were used to reconstitute pneumococcal  
29 growth defect on mannose. No growth complementation could be observed by using modified  
30 peptides. This experiment was done for three independent biological samples and each with three  
31 replicates. \* $p < 0.05$ , \*\*  $p < 0.01$  compared to  $\Delta shp144$  in the absence of synthetic peptide.

32  
33  
34  
35  
36  
37  
38  
39

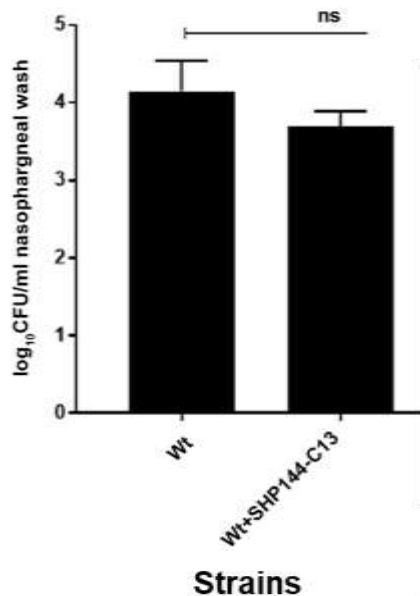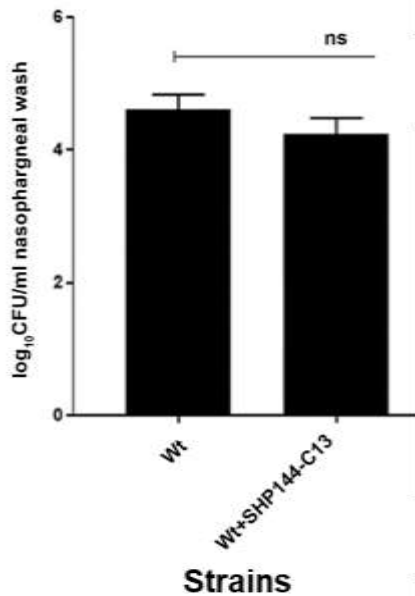

40  
 41 **Figure S2:** Identification the impact of SHP144 synthetic peptides on pneumococcal colonisation in  
 42 murine model. (A-B) mice infected intranasally either with  $2.5 \times 10^5$  CFU/mouse of pneumococcal D39  
 43 wild type (control) or the pneumococcal inoculum containing 200  $\mu$ M of SHP144-C13 peptide. The  
 44 cohort receiving peptide had additional doses of peptide at predetermined times (24, 48 and 72h post  
 45 infection) whereas control group received only 20  $\mu$ l PBS. The mice at day 0 and 5 were sacrificed by

46 cervical dislocation and nasal washes were obtained and processed as described before. Error bars  
47 show the standard error of the mean. A two-tailed unpaired student's t-test and one-way ANOVA  
48 followed by Tukey's multiple comparison tests were applied to compare the bacterial counts with  
49 control group (n=5 for each group, 'ns' not significant).

50  
51

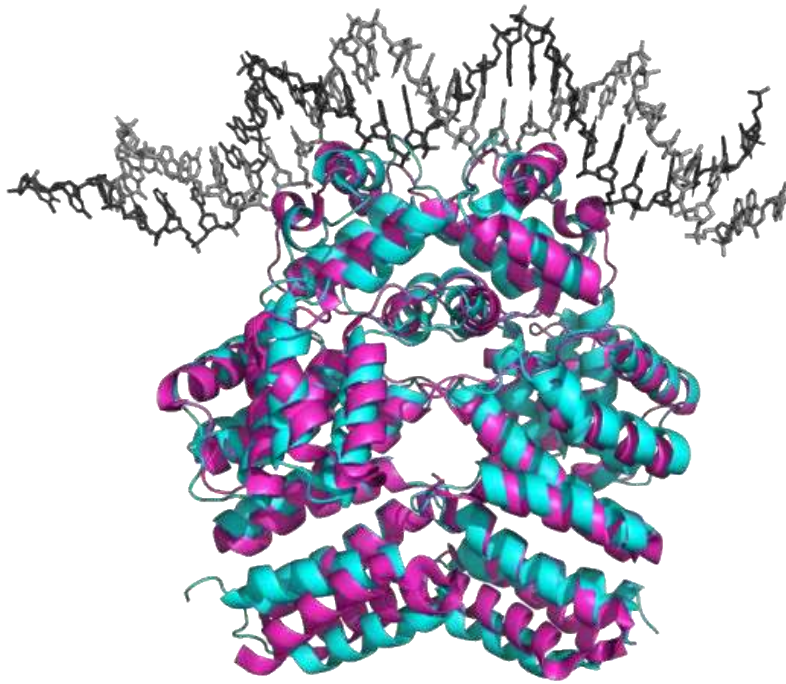

- Rgg144
- Rgg2 from *S. dysgalactiae*

53 **Figure S3:** Overlay of Rgg144 with the DNA bound form of Rgg2 from *S. dysgalactiae* (PDB: 6W1A).  
54 The structure of the unbound form of Rgg144 is broadly comparable to the structure of the DNA bound  
55 form of Rgg2 suggesting a similar mode of action in which binding of the SHP displaces the helix-turn-  
56 helix domains of the Rgg(8).

57  
58  
59

60 **Table S1:** Data collection and refinement statistics.

61

| <b>Rgg144</b>                 |                                |
|-------------------------------|--------------------------------|
| <b>PDB ID</b>                 | 7ZCV                           |
| <b>Wavelength, (Å)</b>        | 0.9795                         |
| <b>Resolution range</b>       | 32.51 – 1.90<br>(1.94 - 1.90)* |
| <b>Space group</b>            | P 21 21 21                     |
| <b>Unit cell, a, b, c (Å)</b> | 75.5, 80.9, 106.5              |
| <b>α, β, γ (°)</b>            | 90, 90, 90                     |
| <b>Total reflections</b>      | 313591 (20704)                 |
| <b>Unique reflections</b>     | 52047 (5148)                   |
| <b>Multiplicity</b>           | 6.0 (6.2)                      |
| <b>Completeness (%)</b>       | 99.9 (99.9)                    |
| <b>Mean I/σ</b>               | 12.3 (2.0)                     |
| <b>Wilson B-factor</b>        | 34.3                           |
| <b>R-sim</b>                  | 0.080 (1.031)                  |
| <b>R-pim</b>                  | 0.044 (0.412)                  |
| <b>CC1/2</b>                  | 0.998 (0.526)                  |
| <b>Refinement</b>             |                                |
| <b>Reflections</b>            | 52046 (5148)                   |
| <b>R-work</b>                 | 0.1865                         |
| <b>R-free</b>                 | 0.2183                         |
| <b>Number of atoms</b>        |                                |
| <b>macromolecules</b>         | 4749                           |
| <b>solvent</b>                | 372                            |
| <b>RMS deviations</b>         |                                |
| <b>Bond lengths (Å)</b>       | 0.011                          |
| <b>Bond angles (°)</b>        | 1.08                           |
| <b>Ramachandran</b>           | 99.3                           |
| <b>  favored (%)</b>          |                                |
| <b>Average B-factor</b>       |                                |
| <b>macromolecules</b>         | 44.3                           |
| <b>solvent</b>                | 44.2                           |
|                               | 47.0                           |

62

63 \*Statistics for the highest-resolution shell are shown in parentheses.

64

65

66



67  
68

**Table S2:** Bacterial strains and plasmids used in this study.

| Strain/Plasmid                        | Description                                                                            | Source                                                                |
|---------------------------------------|----------------------------------------------------------------------------------------|-----------------------------------------------------------------------|
| <i>S. pneumoniae</i> D39              | Serotype 2                                                                             | The National Collection of Type Cultures, London, UK Strain NTCC 7466 |
| $\Delta$ shp144                       | D39 $\Delta$ shp144; Spec <sup>R</sup>                                                 | Reference <sup>1</sup>                                                |
| $\Delta$ shp144com                    | D39; shp144 + $\Delta$ shp144: Spec <sup>R</sup> ; Kan <sup>R</sup>                    | This study                                                            |
| $\Delta$ shp144com <sup>S14/A14</sup> | D39; shp144 <sup>S14/A14</sup> + $\Delta$ shp144: Spec <sup>R</sup> ; Kan <sup>R</sup> | This study                                                            |
| $\Delta$ shp144Com <sup>E15/A15</sup> | D39; shp144 <sup>E15/E15</sup> + $\Delta$ shp144: Spec <sup>R</sup> ; Kan <sup>R</sup> | This study                                                            |
| $\Delta$ shp144Com <sup>W16/A16</sup> | D39; shp144 <sup>W16/A16</sup> + $\Delta$ shp144: Spec <sup>R</sup> ; Kan <sup>R</sup> | This study                                                            |
| $\Delta$ shp144Com <sup>V17/A17</sup> | D39; shp144 <sup>V17/A17</sup> + $\Delta$ shp144: Spec <sup>R</sup> ; Kan <sup>R</sup> | This study                                                            |
| $\Delta$ shp144Com <sup>I18/A18</sup> | D39; shp144 <sup>I18/A18</sup> + $\Delta$ shp144: Spec <sup>R</sup> ; Kan <sup>R</sup> | This study                                                            |
| $\Delta$ shp144Com <sup>V19/A19</sup> | D39; shp144 <sup>V19/A19</sup> + $\Delta$ shp144: Spec <sup>R</sup> ; Kan <sup>R</sup> | This study                                                            |
| $\Delta$ shp144Com <sup>I20/A20</sup> | D39; shp144 <sup>I20/A20</sup> + $\Delta$ shp144: Spec <sup>R</sup> ; Kan <sup>R</sup> | This study                                                            |
| $\Delta$ shp144Com <sup>P21/A21</sup> | D39; shp144 <sup>P21/A21</sup> + $\Delta$ shp144: Spec <sup>R</sup> ; Kan <sup>R</sup> | This study                                                            |
| $\Delta$ shp144Com <sup>F22/A22</sup> | D39; shp144 <sup>F22/A22</sup> + $\Delta$ shp144: Spec <sup>R</sup> ; Kan <sup>R</sup> | This study                                                            |

69  
70

71 **Table S3:** Oligonucleotides primers used in this study\*.

| Primers                 | Sequence (5'-3')                                              |
|-------------------------|---------------------------------------------------------------|
| shp144com/F             | CATGCCATGGCAAGTACAGTATAACACGAAA                               |
| shp144com/R             | ACGGGATCCCCTTTTTGAATTGCGTTTTTCAGCA                            |
| Shp144S14/F             | CCTACTTATTGCGGAGTGGGTTA                                       |
| Shp144S14/R             | TAACCCACTCCGCAATAAGTAGG                                       |
| Shp144 E15/F            | CTTATTTTCGGCGTGGGTTATTGTCA                                    |
| Shp144 E15/R            | TGACAATAACCCACGCCGAAATAAG                                     |
| Shp144 W16/F            | TATTTTCGGAGGCGGTTATTGTCATTC                                   |
| Shp144 W16/R            | GAATGACAATAACCGCCTCCGAAATA                                    |
| Shp144 V17/F            | TCGGAGTGGGCTATTGTCATTCCAT                                     |
| Shp144 V17/R            | ATGGAATGACAATAGCCCACTCCGA                                     |
| Shp144 I18/F            | GGAGTGGGTTGCTGTCATTCCATTTT                                    |
| Shp144 I18/R            | AAAATGGAATGACAGCAACCCACTCC                                    |
| Shp144 V19/F            | TGGGTTATTGCCATTCCATTTTAA                                      |
| Shp144 V19/R            | TTAAAAATGGAATGGCAATAACCCA                                     |
| Shp144 I20/F            | GGTTATTGTCGCTCCATTTTAAAC                                      |
| Shp144 I20/R            | GTTAAAAATGGAGCGACAATAACC                                      |
| Shp144 P21/F            | TATTGTCATTGCATTTTAACTAAT                                      |
| Shp144 P21/R            | ATTAGTTAAAAATGCAATGACAATA                                     |
| Shp144 F22/F            | TGTCATTCCAGCTTAACTAATCT                                       |
| Shp144 F22/R            | AGATTAGTTAAAAGCTGGAATGACA                                     |
| Shp144 L 23/F           | CATTCCATTGCAACTAATCTATAAG                                     |
| Shp144 L 23/R           | CTTATAGATTAGTTGCAAATGGAATG                                    |
| Shp144 T 24/F           | TCCATTTTTAGCTAATCTATAAGTT                                     |
| Shp144 T 24/R           | AACTTATAGATTAGCTAAAAATGGA                                     |
| Shp144 N 25/ F          | TTTTTAACTGCTCTATAAGTTCTT                                      |
| Shp144 N 25/R           | AAGAACTTATAGAGCAGTTAAAAA                                      |
| Shp144 L 26/F           | TAACTAATGCATAAGTTCTTTATATTG                                   |
| Shp144 L 26/R           | CAATATAAAGAAGTTATGCATTAGTTA                                   |
| NcoI- shp144/F          | <u>AACACACGAGGTGCT</u> <b>ACCATGGCA</b> ACTCAGCTTCTGTCAATTCC  |
| BamHI-shp144/R          | <u>CCATTA</u> <b>AAAAATCAAACGGATCCC</b> TTATCAGAACTCATGGAGCGA |
| Mal/F                   | GCTTGAAAAGGAGTATACTT                                          |
| pCEP/R                  | AGGAGACATTCCTTCCGTATC                                         |
| Fusion seq/UF           | CTACTTGAGCCACTATCGA                                           |
| Fusion seq/DR           | AGGCGATTAAGTTGGGTAAC                                          |
| Spd0144-Full/F          | <u>TACTTCCAATCCATGATTG</u> AAAAAATGGAAGTGGG                   |
| Spd0144-Full/R          | <u>TATCCAC</u> TTTACTGTCAATCTATAAGTTCTTTATATT                 |
| T7 Promoter-F (PNAFL)   | TAATACGACTCACTATAGGG                                          |
| pLEICS-01-Seq-R (PNAFL) | ATTAACATTAGTGGTGGTGGT                                         |

72  
73 \*Bold typeface indicates incorporated restriction sites whereas underlined letters represents  
74 homological regions of pCEP and pLEICS-01, respectively.  
75  
76  
77  
78  
79  
80

81 **Table S4:** List of SHP144-C13 synthetic peptides used in this study. The letter (A) represents  
 82 the replacement of individual amino acid of SHP144-C13 with alanine whereas (YSATH)  
 83 indicates the changing of five amino acids (W V I V I) of SHP144-C13.

84  
 85

| Name                               | Sequence                                      |
|------------------------------------|-----------------------------------------------|
| FITC-SHP144-C13                    | FITC- S E W V I V I P F L T N L- COOH         |
| FITC-SHP144-C13 <sup>S14/A14</sup> | FITC- <b>A</b> E W V I V I P F L T N L- COOH  |
| FITC-SHP144-C13 <sup>E15/A15</sup> | FITC- S <b>A</b> W V I V I P F L T N L- COOH  |
| FITC-SHP144-C13 <sup>W16/A16</sup> | FITC- S E <b>A</b> V I V I P F L T N L- COOH  |
| FITC-SHP144-C13 <sup>V17/A17</sup> | FITC- S E W <b>A</b> I V I P F L T N L- COOH  |
| FITC-SHP144-C13 <sup>I18/A18</sup> | FITC- S E W V <b>A</b> V I P F L T N L- COOH  |
| FITC-SHP144-C13 <sup>V19/A19</sup> | FITC- S E W V I <b>A</b> I P F L T N L- COOH  |
| FITC-SHP144-C13 <sup>I20/A20</sup> | FITC- S E W V I V <b>A</b> P F L T N L- COOH  |
| FITC-SHP144-C13 <sup>P21/A21</sup> | FITC- S E W V I V I <b>A</b> F L T N L- COOH  |
| FITC-SHP144-C13 <sup>F22/A22</sup> | FITC- S E W V I V I P <b>A</b> L T N L- COOH  |
| FITC-SHP144-C13 <sup>L23/A23</sup> | FITC- S E W V I V I P F <b>A</b> T N L- COOH  |
| FITC-SHP144-C13 <sup>T24/A24</sup> | FITC- S E W V I V I P F L <b>A</b> N L- COOH  |
| FITC-SHP144-C13 <sup>N25/A25</sup> | FITC- S E W V I V I P F L T <b>A</b> L- COOH  |
| FITC-SHP144-C13 <sup>L26/A26</sup> | FITC- S E W V I V I P F L T N <b>A</b> - COOH |
| FITC-NEC-C13                       | FITC-SE <b>YSATH</b> PFLTNL - COOH            |
| SHP144-C13                         | NH2- S E W V I V I P F L T N L- COOH          |
| SHP144-C13 <sup>S14/A14</sup>      | NH2- <b>A</b> E W V I V I P F L T N L- COOH   |
| SHP144-C13 <sup>P21/A21</sup>      | NH2- S E W V I V I <b>A</b> F L T N L- COOH   |
